# Supplementary material
Source: PubMed Central journal article supplement (PMC6152911)
Supplement: NIHMS77849-supplement-Supplementary_figures.pdf [file NIHMS77849-supplement-Supplementary_figures.pdf]

**Supplementary Figure 1: Immunolabeling of eGluCl, neurofilament and DAPI.**

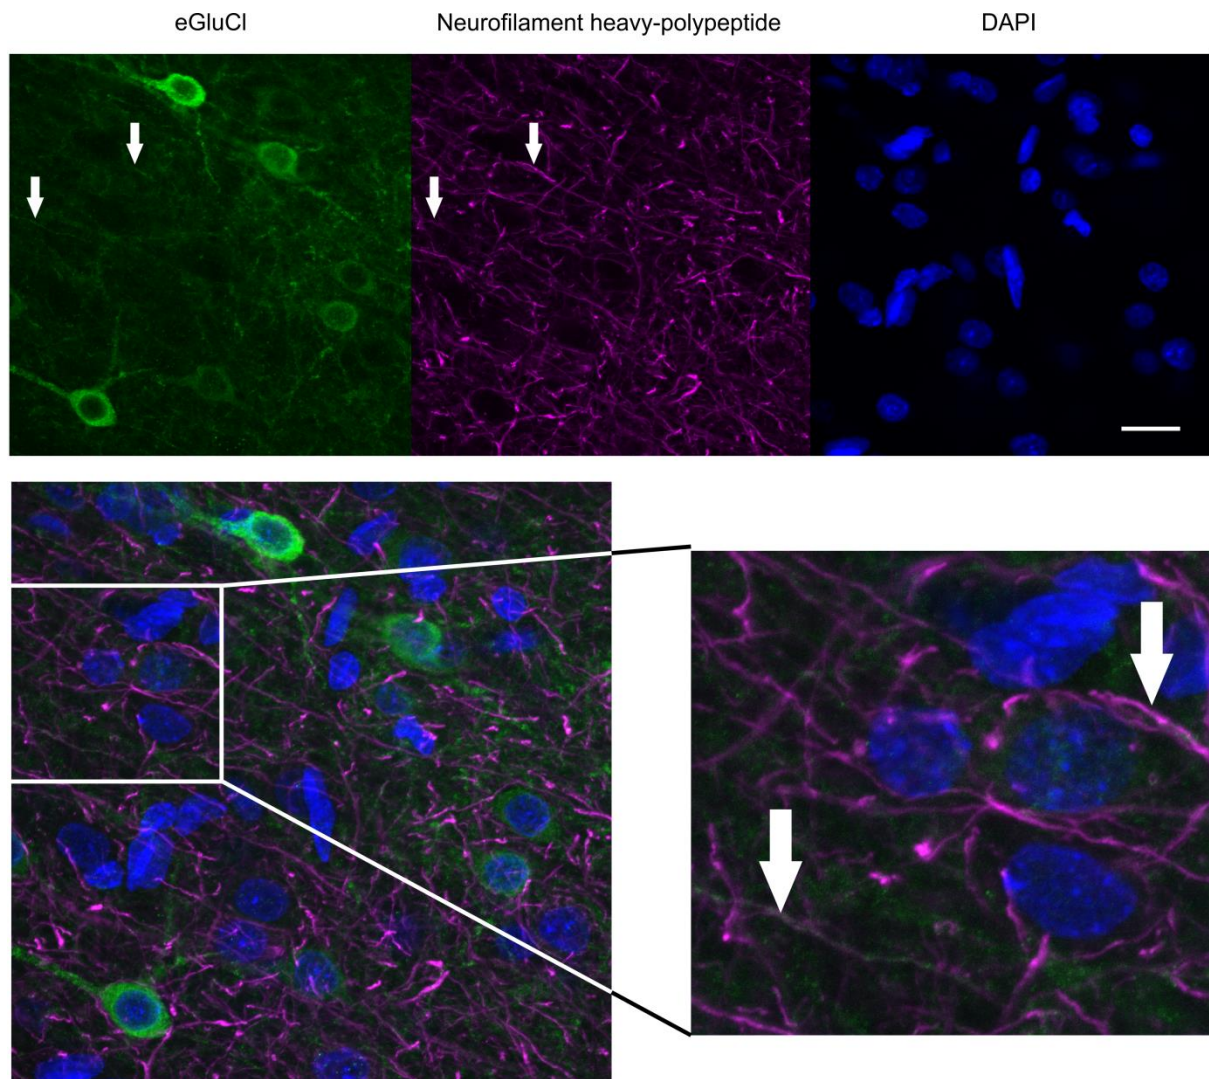

The arrows indicate the overlap of eGluCl and neurofilament heavy polypeptide. The merged image is shown on bottom (n=1 animal). (scale bar 20 $\mu$ m)

**Supplementary Figure 2: Quantification of the acute chemoconvulsant-induced seizure model.**

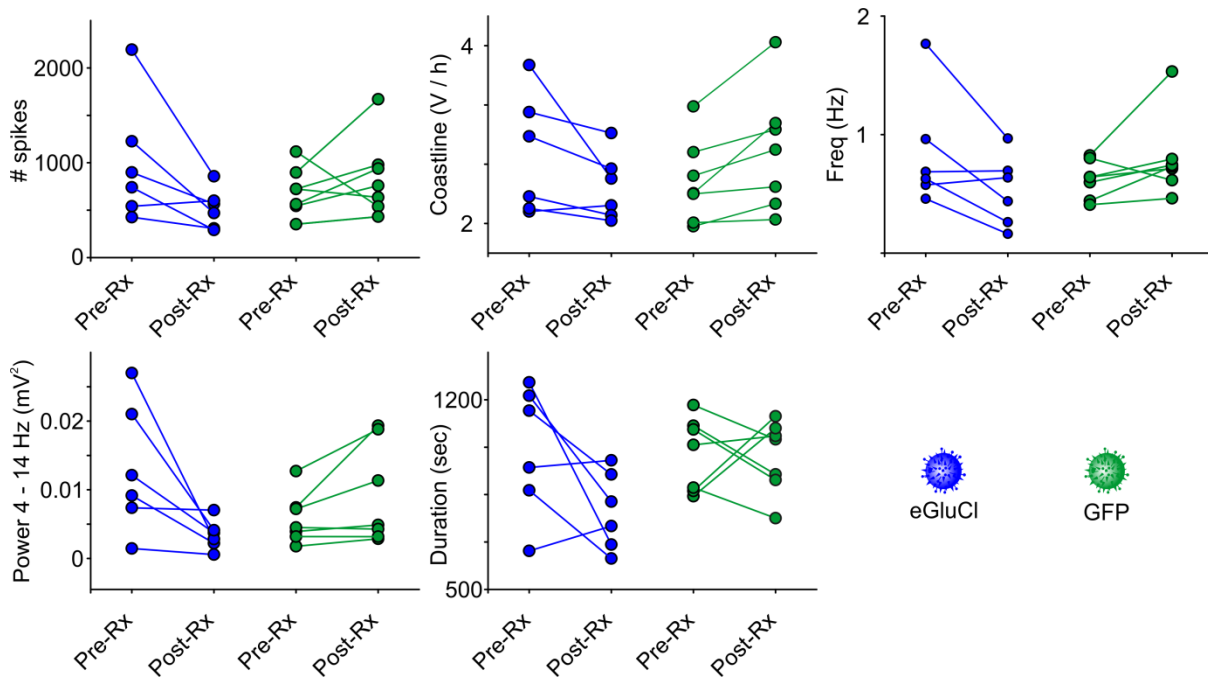

Absolute number of spikes (# spikes), coastline, spike frequency, 4-14Hz power, and seizure duration in animals injected with pilocarpine pre-Rx and post-Rx.

**Supplementary Figure 3: Quantification of the model of chronic focal neocortical epilepsy.**

**a**

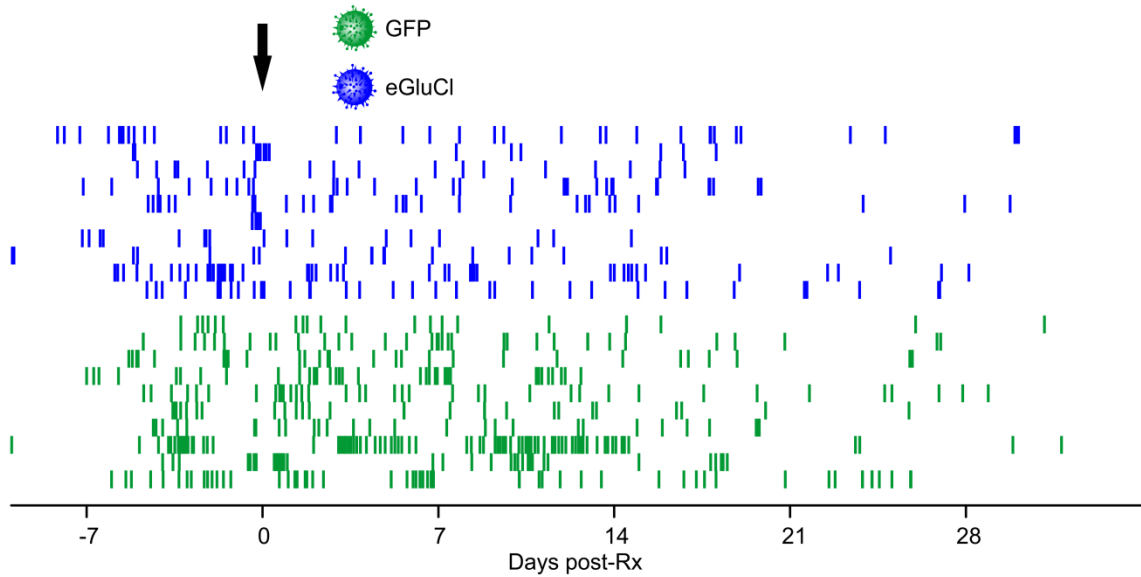

**b**

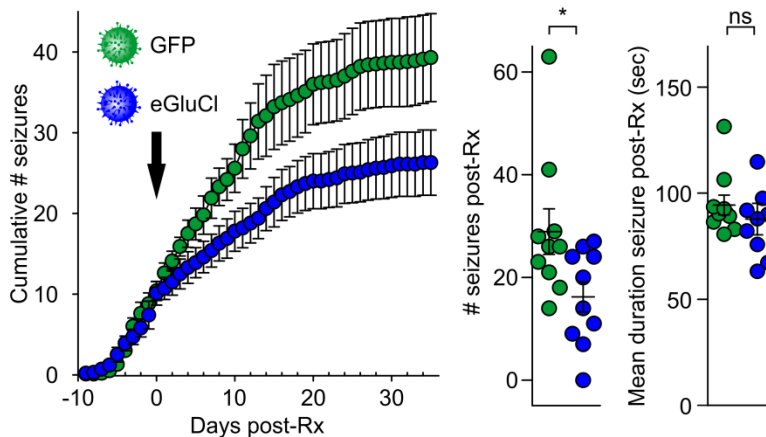

**c**

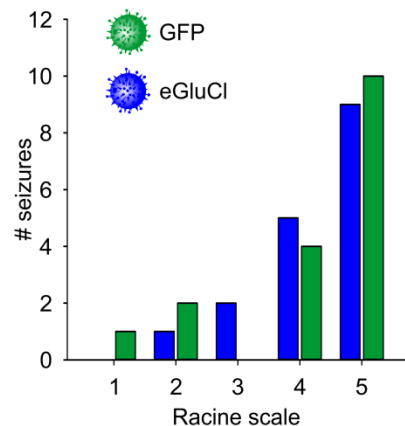

(a) Raster plot of seizures in all animals after TetTx injection. The arrow indicates lentivector injection. (b) Left: cumulative absolute number of seizures in animals treated with either eGluCI or GFP (mean±sem). The arrow indicates the time point of lentivector injection. Middle: absolute cumulative number of seizures for all animals post-Rx at day 35 (eGluCI: 16.2±2.9, n=10; GFP: 28.9±4.4, n=10; mean±sem, p=0.034, Mann Whitney test). \*p<0.05. Right: Average seizure duration in all animals (eGluCI 85.6±53 sec, n=9; GFP 94.3±4.7 sec, n=10; mean±sem, p=0.278, Mann Whitney test; note that one eGluCI-treated animal did not experience any seizures post-Rx). (c) Racine scale for randomly selected seizures (three from each of 6 animals in each group).

### Supplementary Figure 4: Long term behavioural side effect screen.

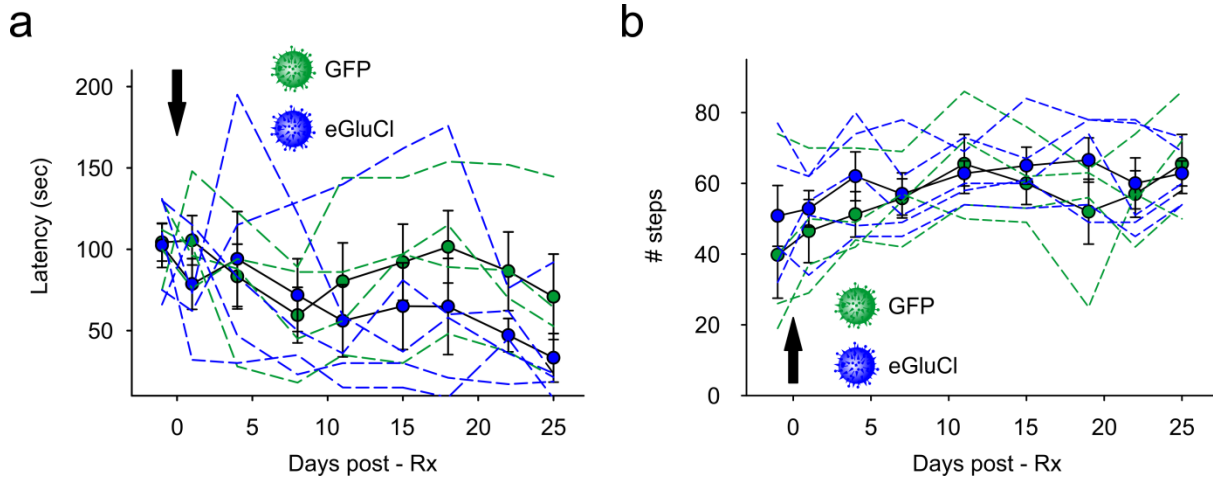

**(a)** Latency to fall from rotarod before and after treatment with eGluCl or GFP. The arrow indicates the timepoint of lentivector injection (mean $\pm$ sem, two-way ANOVA,  $F(1,56)=0.72$ ; eGluCl,  $n=5$ ; GFP,  $n=4$ ). The dashed lines represent individual experiments. **(b)** Absolute number of steps taken by the same animals on the elevated grid (mean $\pm$ sem, two-way ANOVA,  $F(1,56)=0.37$ ; eGluCl,  $n=5$ ; GFP,  $n=4$ ). The dashed lines represent individual experiments.
